# Supplementary material for: Catalytic rhodium (Rh)-based (mesoporous polydopamine) MPDA nanoparticles with enhanced phototherapeutic efficiency for overcoming tumor hypoxia
Source: Royal Society of Chemistry journal article supplement (doi:10.1039/d0bm00625d), 2020-01-01
Supplement: d0bm00625d1.pdf [file d0bm00625d1.pdf]

## Supporting Information

### **Catalytic Rhodium (Rh)-Based (Mesoporous Polydopamine) MPDA Nanoparticles with Enhanced Phototherapeutic Efficiency for Overcoming Tumor Hypoxia**

*Mengli Ding<sup>a</sup>, Zhaohua Miao<sup>b</sup>, Fan Zhang<sup>a</sup>, Jie Liu<sup>a</sup>, Xintao Shuai<sup>c</sup>, Zhengbao Zha<sup>b,\*</sup>,  
and Zhong Cao<sup>a,\*</sup>*

<sup>a</sup> School of Biomedical Engineering, Sun Yat-sen University, Guangzhou, 510006, PR China.

E-mail: [caozhong@mail.sysu.edu.cn](mailto:caozhong@mail.sysu.edu.cn)

<sup>b</sup> School of Food and Biological Engineering, Hefei University of Technology, Hefei, 230009 PR China.

E-mail: [zbzha@hfut.edu.cn](mailto:zbzha@hfut.edu.cn)

<sup>c</sup> PCFM Lab of Ministry of Education, School of Materials Science and Engineering, Sun Yat-sen University, Guangzhou, Guangdong 510275, China.

**Table S1.** Sizes and Zetas of MPDA, Rh@MPDA and Ce6-Rh@MPDA.

| Sample      | Size (nm) | Zeta (mV)  | PDI   |
|-------------|-----------|------------|-------|
| MPDA        | 248.7     | -18.8±5.10 | 0.150 |
| Rh@MPDA     | 257.6     | -23.0±5.39 | 0.163 |
| Ce6-Rh@MPDA | 254.1     | -24.3±5.92 | 0.096 |

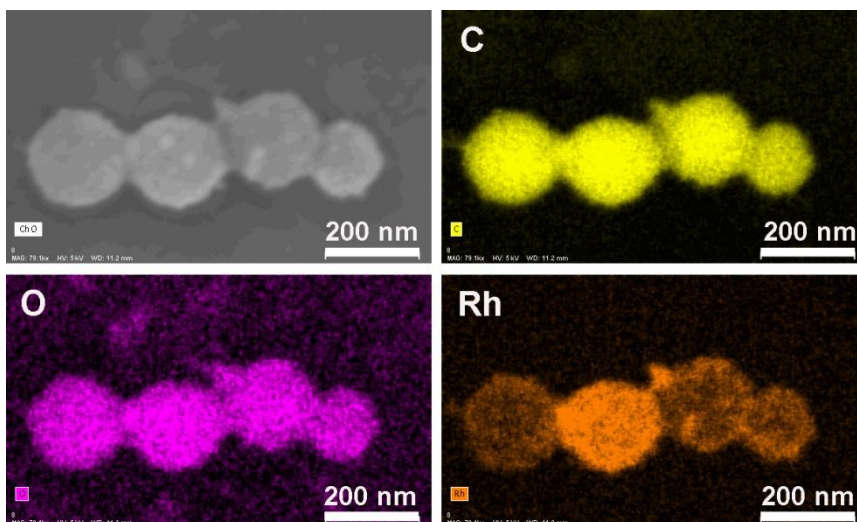

Figure S1. SEM and elemental mapping images of Rh@MPDA.

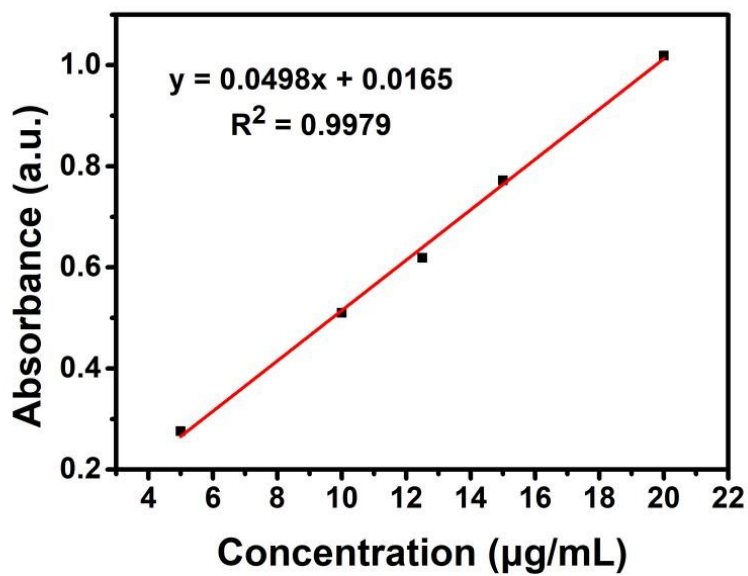

Figure S2. The standard curve of Ce6.

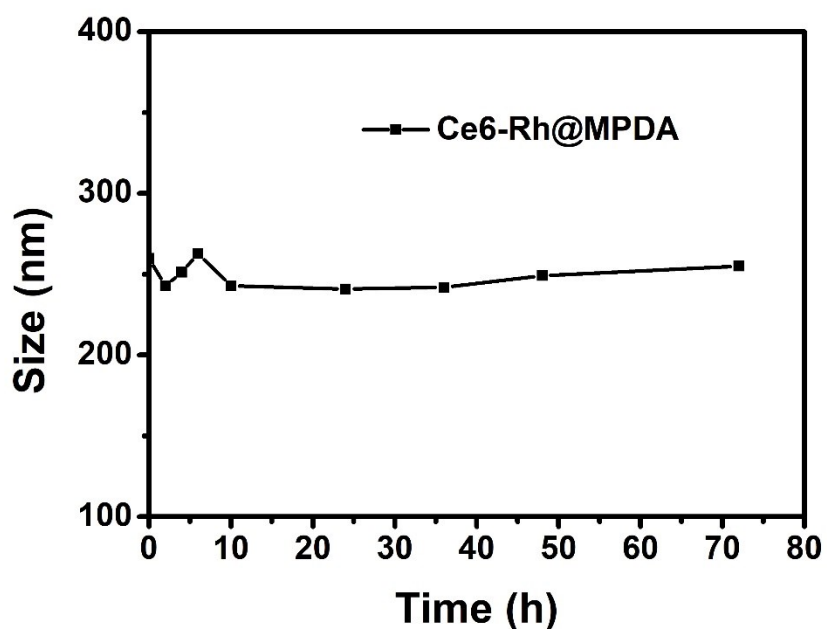

Figure S3. The stability of Ce6-Rh@MPDA in FBS/PBS solution.

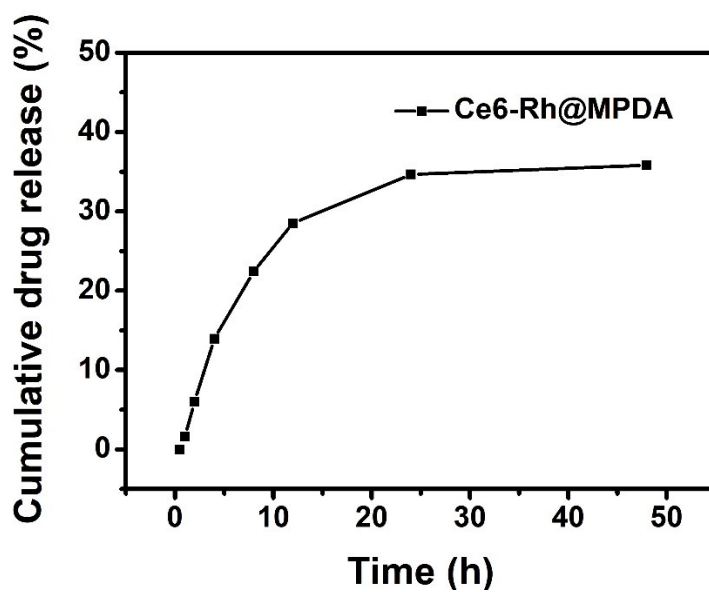

Figure S4. Cumulative drug release of Ce6 in FBS/PBS solution with pH=7.4.

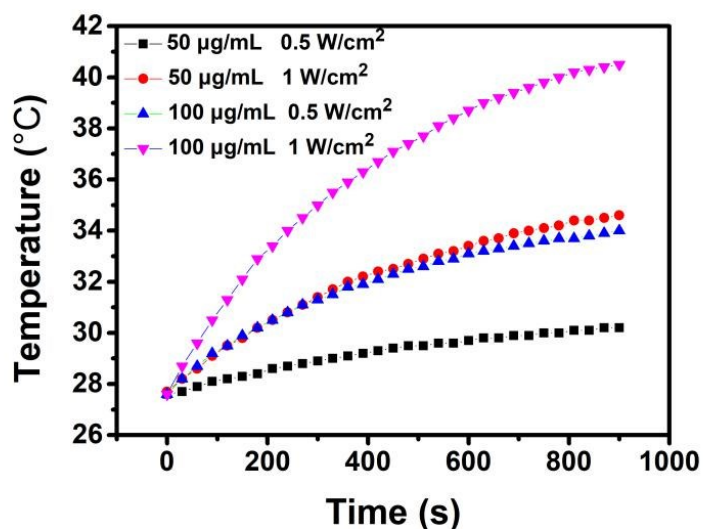

**Figure S5.** Temperature variations of Ce6-Rh@MPDA under different conditions (808 nm laser, 15 min).

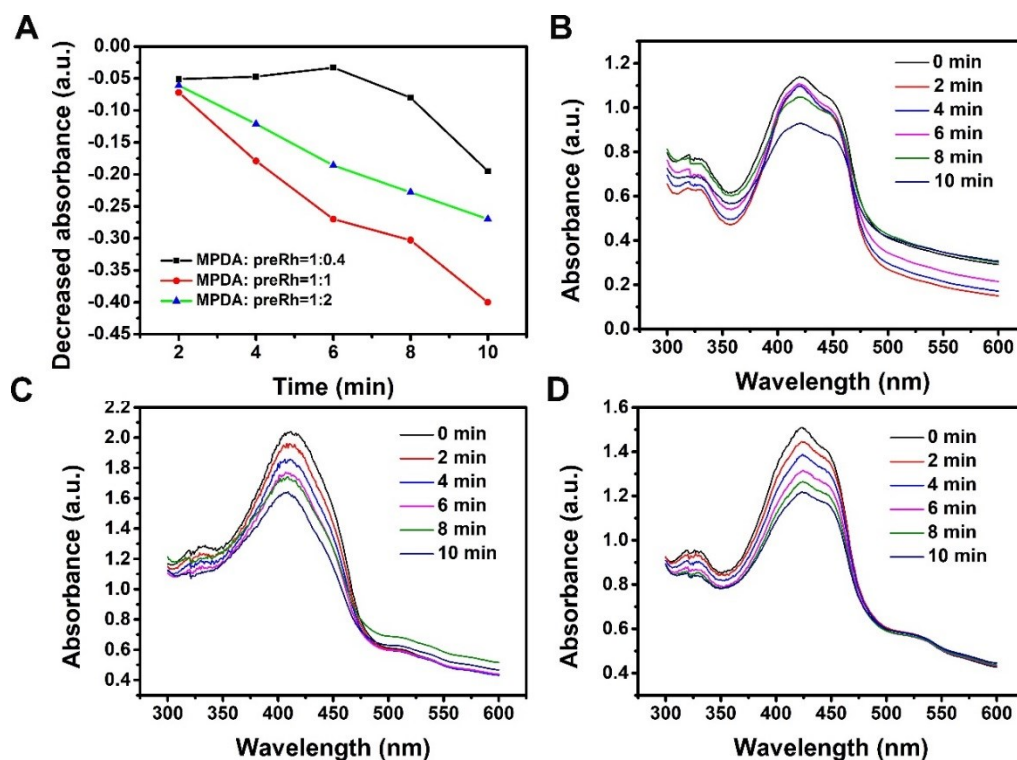

**Figure S6.** A) The decreased absorbance of DPBF with a 635 nm laser at  $0.5 \text{ W cm}^{-2}$ . B-D) DPBF absorbance spectra in solutions with three types of Ce6-Rh@MPDA after irradiation for different times (the ratios of MPDA to rhodium chloride trihydrate were 1:0.4 (B), 1:1 (C) and 1:2 (D); the concentrations of Ce6-Rh@MPDA were  $50 \mu\text{g mL}^{-1}$ ; 635 nm laser:  $0.5 \text{ W cm}^{-2}$ , 10 min).

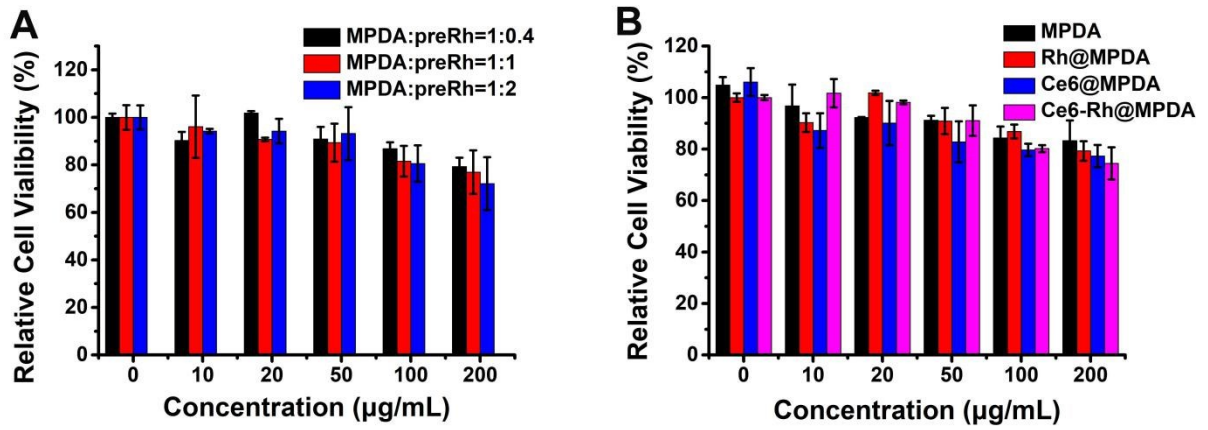

**Figure S7.** A, B) Relative cell viabilities of 4T1 cells incubated with different samples.

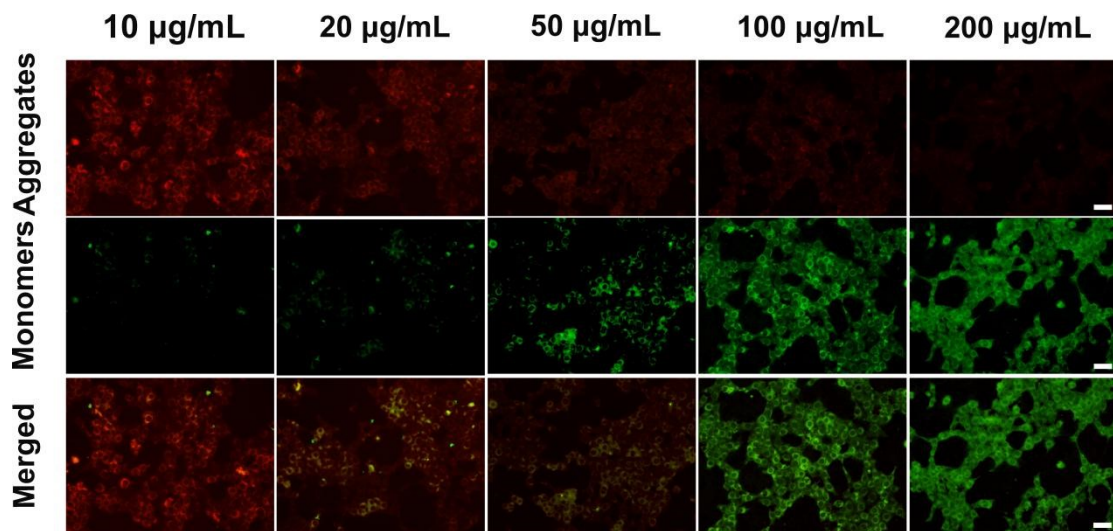

**Figure S8.** Mitochondrial damage in 4T1 cells subjected to Ce6-Rh@MPDA treatments. The cells were stained with JC-1 (red, aggregates; green, monomers). Scale bar: 20  $\mu\text{m}$ .

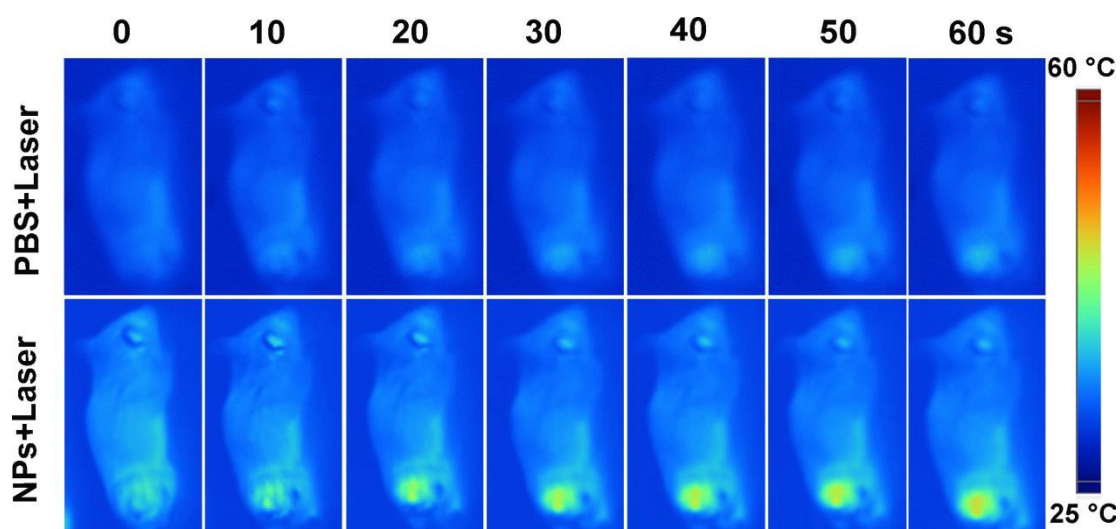

**Figure S9.** Infrared thermal mapping of 4T1 tumor-bearing mice under laser irradiation (808 nm, 1 W cm<sup>-2</sup>, 1 min) post-injection of PBS (200 μL) or Ce6-Rh@MPDA (200 μL, 1 mg mL<sup>-1</sup>).

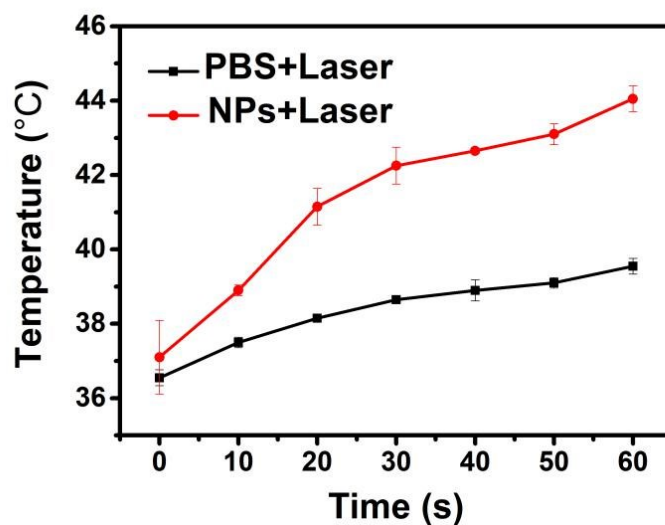

**Figure S10.** Quantitative values of corresponding temperature changes of 4T1 tumor-bearing mice post-injection of PBS solution or Ce6-Rh@MPDA (1 mg mL<sup>-1</sup>) under laser irradiation (808 nm, 1 W cm<sup>-2</sup>, 1 min).

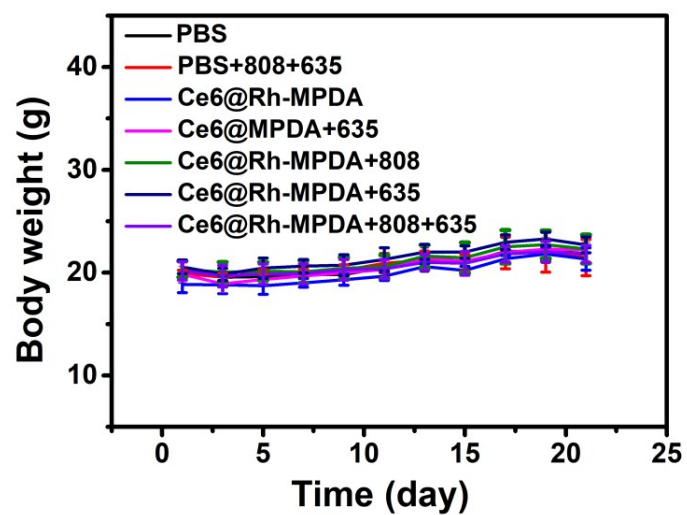

Figure S11. Body weight changes of mice during the experimental period.
